# Supplementary material
Source: ML conference proceedings conference paper supplement (https://openreview.net/forum?id=NCX3Kgb1nh)

Sample dependent Model Ranking Comparison with ChatGPT FSD

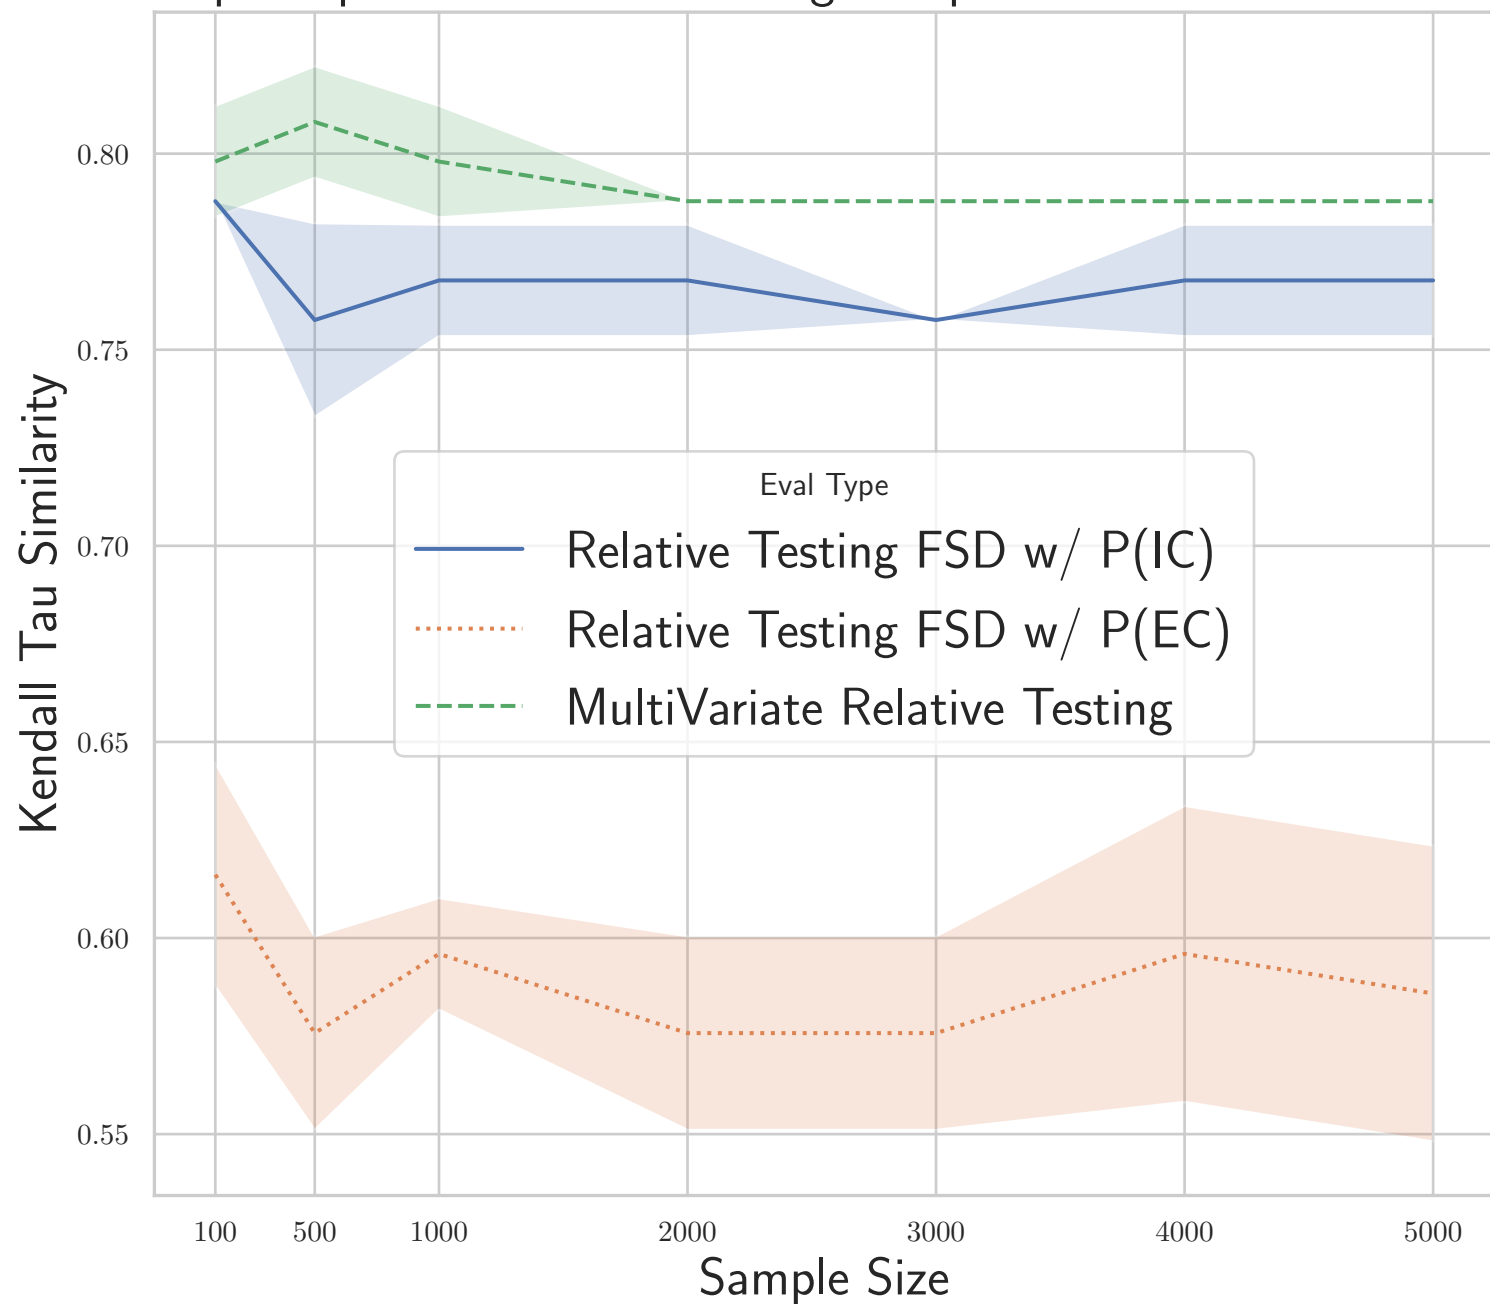

Supplement: supplementary_material [file attachment]
